# Supplementary material for: Stabilization of cyclic and acyclic carbon(0) compounds by differential coordination of heterocyclic carbenes: a theoretical assessment
Source: Royal Society of Chemistry journal article supplement (doi:10.1039/c2dt30855j), 2012-01-01
Supplement: c2dt30855j.pdf [file c2dt30855j.pdf]

# Supporting Information of

## **Stabilization of Cyclic and Acyclic Carbon(0) Compounds by Differential Coordination of Heterocyclic Carbenes : A Theoretical Assessment**

Ashwini K. Phukan\* and Ankur Kanti Guha

*Department of Chemical Sciences*

*Tezpur University*

*Napaam 784028, Assam, India*

Ph : +91 (3712) 267173 (O)

Fax: +91 (3712) 267005

E-mail: [ashwini@tezu.ernet.in](mailto:ashwini@tezu.ernet.in)

**Table S1.** Energies of the  $\pi$  symmetric HOMO (eV) of the first protonated derivatives of **1–6** and second proton affinities ( $\text{kcal mol}^{-1}$ ) calculated at BP86/TZVP level of theory.

| Entry                    | $E_{\text{HOMO}}$ | $E_{\text{PA-2}}$ |
|--------------------------|-------------------|-------------------|
| <b>1-H</b> <sup>1+</sup> | -6.7              | 183.6             |
| <b>2-H</b> <sup>1+</sup> | -8.0              | 162.9             |
| <b>3-H</b> <sup>1+</sup> | -7.4              | 170.6             |
| <b>4-H</b> <sup>1+</sup> | -7.7              | 168.3             |
| <b>5-H</b> <sup>1+</sup> | -8.5              | 150.3             |
| <b>6-H</b> <sup>1+</sup> | -8.1              | 158.7             |

Cartesian coordinates of the optimized geometries of all the molecules at the BP86/TZVP level of theory along with the total energies (T. E.) including zero point vibrational correction.

|    |                               |              |              |
|----|-------------------------------|--------------|--------------|
| 1. | <b>1</b> , T. E. = -647.61548 |              |              |
| 6  | 3.510457000                   | 0.178731000  | -0.075127000 |
| 7  | 3.030210000                   | -1.062379000 | 0.122508000  |
| 6  | 1.642573000                   | -1.035341000 | 0.142070000  |
| 6  | 1.192382000                   | 0.312779000  | -0.008597000 |
| 7  | 2.465793000                   | 1.026513000  | -0.172715000 |
| 1  | 1.084024000                   | -1.926565000 | 0.401230000  |
| 1  | 4.560668000                   | 0.427162000  | -0.178020000 |
| 6  | -0.000004000                  | 1.003697000  | 0.000080000  |
| 6  | -1.192379000                  | 0.312771000  | 0.008721000  |
| 6  | -1.642555000                  | -1.035345000 | -0.142069000 |
| 7  | -3.030203000                  | -1.062356000 | -0.122772000 |
| 6  | -3.510468000                  | 0.178729000  | 0.074973000  |
| 7  | -2.465808000                  | 1.026488000  | 0.172854000  |
| 1  | -1.084016000                  | -1.926435000 | -0.401734000 |
| 1  | -4.560666000                  | 0.427082000  | 0.178211000  |
| 6  | -2.522015000                  | 2.461981000  | 0.358525000  |
| 1  | -3.110941000                  | 2.946530000  | -0.435663000 |
| 1  | -2.936574000                  | 2.724518000  | 1.344523000  |
| 1  | -1.461875000                  | 2.777157000  | 0.298048000  |
| 6  | -3.850286000                  | -2.255604000 | -0.257880000 |
| 1  | -3.651988000                  | -2.743142000 | -1.224262000 |
| 1  | -3.625421000                  | -2.964157000 | 0.553660000  |
| 1  | -4.911014000                  | -1.976999000 | -0.209983000 |
| 6  | 2.521979000                   | 2.461983000  | -0.358572000 |
| 1  | 2.936413000                   | 2.724404000  | -1.344654000 |
| 1  | 1.461851000                   | 2.777176000  | -0.298008000 |
| 1  | 3.111009000                   | 2.946623000  | 0.435483000  |
| 6  | 3.850322000                   | -2.255561000 | 0.258029000  |
| 1  | 4.911004000                   | -1.977244000 | 0.207598000  |

|    |                               |              |              |
|----|-------------------------------|--------------|--------------|
| 1  | 3.653785000                   | -2.741604000 | 1.225533000  |
| 1  | 3.623761000                   | -2.965292000 | -0.552004000 |
| 2. | <b>2</b> , T. E. = -613.17295 |              |              |
| 6  | -0.000322000                  | 0.001228000  | -0.006811000 |
| 6  | 1.332989000                   | 0.010417000  | 0.003252000  |
| 6  | 2.151176000                   | -0.933136000 | 0.786012000  |
| 6  | 3.506008000                   | -0.887515000 | 0.784489000  |
| 7  | 4.226584000                   | 0.064991000  | 0.067566000  |
| 6  | 3.504662000                   | 0.959610000  | -0.719158000 |
| 6  | 2.149887000                   | 0.968936000  | -0.762343000 |
| 1  | 4.111786000                   | -1.587358000 | 1.362940000  |
| 1  | 4.109754000                   | 1.670568000  | -1.284456000 |
| 6  | -1.333635000                  | -0.008781000 | -0.000499000 |
| 6  | -2.152170000                  | 0.758079000  | 0.955569000  |
| 6  | -3.506773000                  | 0.708093000  | 0.949246000  |
| 7  | -4.227527000                  | -0.087566000 | 0.060978000  |
| 6  | -3.504790000                  | -0.799670000 | -0.894253000 |
| 6  | -2.150127000                  | -0.794539000 | -0.942885000 |
| 1  | -4.112438000                  | 1.274089000  | 1.659290000  |
| 1  | -4.109074000                  | -1.383071000 | -1.591295000 |
| 1  | 1.647565000                   | 1.717815000  | -1.375474000 |
| 1  | 1.650275000                   | -1.686125000 | 1.395140000  |
| 1  | -1.651447000                  | 1.378485000  | 1.699499000  |
| 1  | -1.647788000                  | -1.399658000 | -1.698188000 |
| 6  | -5.662167000                  | 0.099047000  | -0.093117000 |
| 1  | -6.113145000                  | -0.823395000 | -0.485702000 |
| 1  | -6.113212000                  | 0.307738000  | 0.887404000  |
| 1  | -5.910428000                  | 0.931355000  | -0.778649000 |
| 6  | 5.664800000                   | -0.071928000 | -0.104661000 |
| 1  | 5.929653000                   | -0.725913000 | -0.956657000 |
| 1  | 6.112007000                   | 0.918475000  | -0.272129000 |
| 1  | 6.105857000                   | -0.494031000 | 0.809420000  |

|    |                               |              |              |
|----|-------------------------------|--------------|--------------|
| 3. | <b>3</b> , T. E. = -630.38964 |              |              |
| 6  | 3.628388000                   | 0.298864000  | -0.368836000 |
| 7  | 2.488375000                   | 1.028174000  | -0.365646000 |
| 6  | 1.396830000                   | 0.273178000  | 0.215200000  |
| 6  | 2.006619000                   | -0.982048000 | 0.487766000  |
| 7  | 3.350310000                   | -0.909233000 | 0.154567000  |
| 1  | 4.592456000                   | 0.605067000  | -0.757312000 |
| 1  | 1.599086000                   | -1.853633000 | 0.984647000  |
| 6  | 0.201236000                   | 0.882755000  | 0.550901000  |
| 6  | -3.507116000                  | 0.640356000  | 0.775840000  |
| 6  | -2.232379000                  | 1.055972000  | 0.988842000  |
| 6  | -1.073363000                  | 0.438234000  | 0.338290000  |
| 6  | -1.465021000                  | -0.646844000 | -0.573810000 |
| 6  | -2.757185000                  | -1.021744000 | -0.760527000 |
| 7  | -3.812034000                  | -0.426012000 | -0.071974000 |
| 1  | -4.367422000                  | 1.098641000  | 1.267063000  |
| 1  | -2.050510000                  | 1.880057000  | 1.681015000  |
| 1  | -0.686400000                  | -1.174773000 | -1.128648000 |
| 1  | -3.047645000                  | -1.822812000 | -1.443903000 |
| 6  | 2.333872000                   | 2.422185000  | -0.727892000 |
| 1  | 1.977455000                   | 2.535249000  | -1.763353000 |
| 1  | 1.551319000                   | 2.815197000  | -0.050394000 |
| 1  | 3.285024000                   | 2.957818000  | -0.600454000 |
| 6  | 4.312611000                   | -1.993426000 | 0.298085000  |
| 1  | 5.300803000                   | -1.649163000 | -0.031881000 |
| 1  | 4.373267000                   | -2.303511000 | 1.351144000  |
| 1  | 4.006956000                   | -2.854243000 | -0.314515000 |
| 6  | -5.187196000                  | -0.673778000 | -0.473474000 |
| 1  | -5.296937000                  | -1.722414000 | -0.785413000 |
| 1  | -5.857765000                  | -0.500092000 | 0.380601000  |
| 1  | -5.510017000                  | -0.024112000 | -1.309534000 |
| 4. | <b>4</b> , T. E. = -646.41294 |              |              |
| 6  | 2.927177000                   | -0.305878000 | -0.009975000 |

|    |                              |              |              |
|----|------------------------------|--------------|--------------|
| 7  | 2.443146000                  | 0.958085000  | 0.027820000  |
| 6  | 1.034229000                  | 0.936525000  | 0.052422000  |
| 6  | 0.696642000                  | -0.491579000 | 0.063703000  |
| 7  | 1.891354000                  | -1.198703000 | -0.002663000 |
| 1  | 3.973089000                  | -0.586383000 | 0.036637000  |
| 6  | -0.696599000                 | -0.491544000 | -0.062890000 |
| 6  | -1.034137000                 | 0.936603000  | -0.052185000 |
| 7  | -1.891343000                 | -1.198639000 | 0.003081000  |
| 7  | -2.443066000                 | 0.958159000  | -0.028785000 |
| 6  | 0.000091000                  | 1.882273000  | -0.000070000 |
| 6  | -2.927139000                 | -0.305804000 | 0.009388000  |
| 1  | -3.973033000                 | -0.586267000 | -0.037866000 |
| 6  | 3.215908000                  | 2.192226000  | -0.022649000 |
| 1  | 2.496202000                  | 3.003851000  | 0.156107000  |
| 1  | 3.994991000                  | 2.198858000  | 0.753509000  |
| 1  | 3.676689000                  | 2.331485000  | -1.012288000 |
| 6  | 2.052576000                  | -2.641462000 | -0.011573000 |
| 1  | 3.118314000                  | -2.893255000 | -0.091653000 |
| 1  | 1.648971000                  | -3.081659000 | 0.914422000  |
| 1  | 1.520946000                  | -3.074996000 | -0.873771000 |
| 6  | -2.052642000                 | -2.641404000 | 0.011524000  |
| 1  | -1.520814000                 | -3.075195000 | 0.873460000  |
| 1  | -3.118372000                 | -2.893158000 | 0.091836000  |
| 1  | -1.649293000                 | -3.081355000 | -0.914701000 |
| 6  | -3.216020000                 | 2.192069000  | 0.022948000  |
| 1  | -3.663847000                 | 2.338179000  | 1.017582000  |
| 1  | -2.499722000                 | 3.003291000  | -0.170474000 |
| 1  | -4.005263000                 | 2.192130000  | -0.742837000 |
| 5. | <b>5, T. E. = -611.97061</b> |              |              |
| 6  | 1.664350000                  | -1.075315000 | 0.009558000  |
| 6  | 0.721890000                  | -0.082726000 | 0.000093000  |
| 6  | 1.096455000                  | 1.350980000  | 0.005057000  |
| 6  | 2.499113000                  | 1.609955000  | 0.024351000  |

|   |              |              |              |
|---|--------------|--------------|--------------|
| 6 | 3.404580000  | 0.580878000  | 0.031710000  |
| 7 | 3.002335000  | -0.752745000 | 0.029082000  |
| 1 | 1.445353000  | -2.146475000 | 0.008607000  |
| 1 | 2.856263000  | 2.641642000  | 0.036551000  |
| 1 | 4.483869000  | 0.732326000  | 0.044836000  |
| 6 | -0.721903000 | -0.082724000 | 0.000055000  |
| 6 | -1.664364000 | -1.075310000 | -0.009629000 |
| 7 | -3.002352000 | -0.752732000 | -0.029170000 |
| 6 | -3.404591000 | 0.580885000  | -0.031687000 |
| 6 | -2.499120000 | 1.609963000  | -0.024316000 |
| 6 | -1.096466000 | 1.350986000  | -0.005039000 |
| 1 | -1.445377000 | -2.146472000 | -0.008921000 |
| 1 | -4.483878000 | 0.732344000  | -0.044765000 |
| 1 | -2.856270000 | 2.641650000  | -0.036557000 |
| 6 | -0.000001000 | 2.257428000  | -0.000089000 |
| 6 | 4.020030000  | -1.801118000 | -0.052137000 |
| 1 | 4.837154000  | -1.585121000 | 0.650704000  |
| 1 | 3.571498000  | -2.764644000 | 0.220401000  |
| 1 | 4.434687000  | -1.876655000 | -1.070601000 |
| 6 | -4.019973000 | -1.801166000 | 0.052188000  |
| 1 | -3.571937000 | -2.764356000 | -0.222370000 |
| 1 | -4.433135000 | -1.878079000 | 1.071163000  |
| 1 | -4.838109000 | -1.584113000 | -0.649131000 |

6. **6**, T. E. = -629.19759

|   |              |              |              |
|---|--------------|--------------|--------------|
| 6 | -1.815686000 | 0.895384000  | -0.014454000 |
| 6 | -0.649400000 | 0.172732000  | -0.005459000 |
| 6 | -0.662887000 | -1.362776000 | -0.000953000 |
| 6 | -1.967667000 | -1.925823000 | -0.010322000 |
| 6 | -3.097241000 | -1.144800000 | -0.021144000 |
| 7 | -3.026991000 | 0.252186000  | -0.028316000 |
| 1 | -1.872880000 | 1.986942000  | -0.015346000 |
| 1 | -2.076895000 | -3.012710000 | -0.013670000 |
| 1 | -4.107919000 | -1.550818000 | -0.030214000 |

|    |                                              |              |              |
|----|----------------------------------------------|--------------|--------------|
| 6  | 0.740013000                                  | 0.453424000  | -0.006873000 |
| 6  | 1.397939000                                  | -0.812241000 | 0.001377000  |
| 6  | 0.607753000                                  | -1.980881000 | 0.003250000  |
| 7  | 2.773018000                                  | -0.511587000 | 0.006995000  |
| 7  | 1.713259000                                  | 1.439043000  | -0.004426000 |
| 6  | 2.934215000                                  | 0.834416000  | 0.003546000  |
| 1  | 3.880380000                                  | 1.363723000  | 0.004111000  |
| 6  | -4.270739000                                 | 1.014448000  | 0.049582000  |
| 1  | -4.067316000                                 | 2.069557000  | -0.173645000 |
| 1  | -4.992161000                                 | 0.634565000  | -0.689105000 |
| 1  | -4.721009000                                 | 0.944177000  | 1.053856000  |
| 6  | 3.816304000                                  | -1.531709000 | 0.017389000  |
| 1  | 3.283754000                                  | -2.494496000 | 0.013874000  |
| 1  | 4.451296000                                  | -1.454470000 | -0.876988000 |
| 1  | 4.435273000                                  | -1.452716000 | 0.922789000  |
| 6  | 1.503769000                                  | 2.880968000  | -0.011726000 |
| 1  | 0.935966000                                  | 3.181814000  | 0.880941000  |
| 1  | 2.473921000                                  | 3.394168000  | -0.009360000 |
| 1  | 0.944355000                                  | 3.173912000  | -0.912291000 |
| 7. | <b>1-H<sup>1+</sup></b> , T. E. = -648.11193 |              |              |
| 6  | -3.515199000                                 | 0.159356000  | -0.022642000 |
| 7  | -3.035097000                                 | -1.086526000 | 0.037541000  |
| 6  | -1.647287000                                 | -1.048861000 | 0.051795000  |
| 6  | -1.247271000                                 | 0.298481000  | 0.003034000  |
| 7  | -2.467618000                                 | 1.018015000  | -0.047272000 |
| 1  | -1.074390000                                 | -1.961361000 | 0.134208000  |
| 1  | -4.562099000                                 | 0.437225000  | -0.052342000 |
| 6  | 0.000000000                                  | 0.952819000  | 0.000027000  |
| 6  | 1.247271000                                  | 0.298480000  | -0.003000000 |
| 6  | 1.647285000                                  | -1.048863000 | -0.051766000 |
| 7  | 3.035096000                                  | -1.086526000 | -0.037601000 |
| 6  | 3.515200000                                  | 0.159356000  | 0.022567000  |
| 7  | 2.467619000                                  | 1.018013000  | 0.047279000  |



|    |                                                           |              |              |
|----|-----------------------------------------------------------|--------------|--------------|
| 1  | 1.074383000                                               | -1.961365000 | -0.134109000 |
| 1  | 4.562102000                                               | 0.437226000  | 0.052203000  |
| 6  | 2.578097000                                               | 2.469391000  | 0.114871000  |
| 1  | 2.065992000                                               | 2.843736000  | 1.013073000  |
| 1  | 3.637078000                                               | 2.748019000  | 0.163759000  |
| 1  | 2.128590000                                               | 2.926339000  | -0.778784000 |
| 6  | 3.844789000                                               | -2.305817000 | -0.078357000 |
| 1  | 3.618580000                                               | -2.930248000 | 0.796051000  |
| 1  | 3.627481000                                               | -2.864136000 | -0.998575000 |
| 1  | 4.906204000                                               | -2.033902000 | -0.063813000 |
| 6  | -2.578092000                                              | 2.469393000  | -0.114863000 |
| 1  | -3.637068000                                              | 2.748018000  | -0.163884000 |
| 1  | -2.128698000                                              | 2.926341000  | 0.778849000  |
| 1  | -2.065877000                                              | 2.843741000  | -1.013000000 |
| 6  | -3.844793000                                              | -2.305813000 | 0.078380000  |
| 1  | -4.906204000                                              | -2.033920000 | 0.063152000  |
| 1  | -3.618112000                                              | -2.930580000 | -0.795664000 |
| 1  | -3.627962000                                              | -2.863770000 | 0.998930000  |
| 1  | 0.000001000                                               | 2.040262000  | 0.000053000  |
| 8. | <b>1-H<sub>2</sub><sup>12+</sup></b> , T. E. = -648.40345 |              |              |
| 6  | 3.437787000                                               | 0.023933000  | -0.287181000 |
| 7  | 2.939246000                                               | 1.009204000  | 0.474674000  |
| 6  | 1.593769000                                               | 0.760530000  | 0.689632000  |
| 6  | 1.272234000                                               | -0.406269000 | 0.035900000  |
| 7  | 2.452604000                                               | -0.849703000 | -0.570075000 |
| 1  | 0.986165000                                               | 1.421216000  | 1.298728000  |
| 1  | 4.466581000                                               | -0.055992000 | -0.625642000 |
| 6  | 0.000001000                                               | -1.210824000 | -0.000008000 |
| 6  | -1.272234000                                              | -0.406270000 | -0.035906000 |
| 6  | -1.593775000                                              | 0.760528000  | -0.689638000 |
| 7  | -2.939252000                                              | 1.009197000  | -0.474677000 |
| 6  | -3.437787000                                              | 0.023927000  | 0.287184000  |
| 7  | -2.452598000                                              | -0.849704000 | 0.570079000  |

|    |                                              |              |              |
|----|----------------------------------------------|--------------|--------------|
| 1  | -0.986174000                                 | 1.421216000  | -1.298737000 |
| 1  | -4.466579000                                 | -0.056000000 | 0.625650000  |
| 6  | -2.631923000                                 | -2.069701000 | 1.379678000  |
| 1  | -1.992439000                                 | -2.027730000 | 2.270816000  |
| 1  | -3.678275000                                 | -2.124782000 | 1.699684000  |
| 1  | -2.397903000                                 | -2.957641000 | 0.778938000  |
| 6  | -3.700019000                                 | 2.161435000  | -0.999218000 |
| 1  | -3.289568000                                 | 3.090604000  | -0.584976000 |
| 1  | -3.635146000                                 | 2.171097000  | -2.094151000 |
| 1  | -4.748449000                                 | 2.059820000  | -0.698634000 |
| 6  | 2.631935000                                  | -2.069703000 | -1.379668000 |
| 1  | 3.678291000                                  | -2.124787000 | -1.699663000 |
| 1  | 2.397908000                                  | -2.957641000 | -0.778927000 |
| 1  | 1.992460000                                  | -2.027735000 | -2.270813000 |
| 6  | 3.700010000                                  | 2.161443000  | 0.999221000  |
| 1  | 4.748430000                                  | 2.059859000  | 0.698593000  |
| 1  | 3.289524000                                  | 3.090614000  | 0.585019000  |
| 1  | 3.635177000                                  | 2.171073000  | 2.094156000  |
| 1  | -0.018500000                                 | -1.880165000 | 0.877266000  |
| 1  | 0.018502000                                  | -1.880154000 | -0.877291000 |
| 9. | <b>2-H<sup>1+</sup></b> , T. E. = -613.63604 |              |              |
| 6  | -0.000027000                                 | 1.162273000  | -0.001947000 |
| 6  | -1.287051000                                 | 0.583843000  | 0.004276000  |
| 6  | -1.621672000                                 | -0.796261000 | 0.221952000  |
| 6  | -2.923916000                                 | -1.228552000 | 0.216429000  |
| 7  | -3.972165000                                 | -0.376931000 | -0.002946000 |
| 6  | -3.707668000                                 | 0.960501000  | -0.182606000 |
| 6  | -2.428265000                                 | 1.442324000  | -0.173334000 |
| 1  | -3.188293000                                 | -2.270366000 | 0.395955000  |
| 1  | -4.576120000                                 | 1.600949000  | -0.335130000 |
| 6  | 1.287067000                                  | 0.583942000  | -0.006729000 |
| 6  | 1.621984000                                  | -0.795919000 | -0.225482000 |
| 6  | 2.924199000                                  | -1.228311000 | -0.218158000 |

|   |              |              |              |
|---|--------------|--------------|--------------|
| 7 | 3.972060000  | -0.376966000 | 0.003993000  |
| 6 | 3.707344000  | 0.960315000  | 0.184474000  |
| 6 | 2.427995000  | 1.442251000  | 0.173414000  |
| 1 | 3.188846000  | -2.269936000 | -0.398324000 |
| 1 | 4.575578000  | 1.600570000  | 0.339078000  |
| 1 | -2.279015000 | 2.512265000  | -0.324535000 |
| 1 | -0.859449000 | -1.537453000 | 0.448168000  |
| 1 | 0.860111000  | -1.536705000 | -0.454228000 |
| 1 | 2.278579000  | 2.512098000  | 0.325133000  |
| 6 | 5.365929000  | -0.853346000 | -0.023399000 |
| 1 | 5.913474000  | -0.441738000 | 0.834213000  |
| 1 | 5.373532000  | -1.946728000 | 0.044728000  |
| 1 | 5.857682000  | -0.544936000 | -0.957126000 |
| 6 | -5.365844000 | -0.853586000 | 0.027905000  |
| 1 | -5.851405000 | -0.556817000 | 0.968643000  |
| 1 | -5.918876000 | -0.431017000 | -0.820745000 |
| 1 | -5.374256000 | -1.946039000 | -0.054138000 |
| 1 | -0.000092000 | 2.256290000  | 0.000207000  |

10. **2-H<sub>2</sub><sup>12+</sup>**, T. E. = -613.89563

|   |              |              |              |
|---|--------------|--------------|--------------|
| 6 | 0.000395000  | 1.570687000  | -0.004859000 |
| 6 | 1.297720000  | 0.780951000  | 0.004812000  |
| 6 | 1.556885000  | -0.238953000 | -0.929510000 |
| 6 | 2.790022000  | -0.871955000 | -0.951931000 |
| 7 | 3.769835000  | -0.524137000 | -0.074832000 |
| 6 | 3.548028000  | 0.450378000  | 0.844646000  |
| 6 | 2.328106000  | 1.109843000  | 0.901840000  |
| 1 | 3.037255000  | -1.656790000 | -1.666920000 |
| 1 | 4.373818000  | 0.682343000  | 1.517374000  |
| 6 | -1.297262000 | 0.781610000  | -0.009288000 |
| 6 | -1.562197000 | -0.222300000 | 0.940758000  |
| 6 | -2.795510000 | -0.854736000 | 0.966623000  |
| 7 | -3.770100000 | -0.521741000 | 0.077921000  |
| 6 | -3.542710000 | 0.437021000  | -0.856540000 |

|   |              |              |              |
|---|--------------|--------------|--------------|
| 6 | -2.322271000 | 1.095323000  | -0.917719000 |
| 1 | -3.047193000 | -1.627239000 | 1.693419000  |
| 1 | -4.364500000 | 0.657835000  | -1.537859000 |
| 1 | 2.199287000  | 1.892052000  | 1.651824000  |
| 1 | 0.809650000  | -0.544699000 | -1.663343000 |
| 1 | -0.819421000 | -0.515455000 | 1.684219000  |
| 1 | -2.189082000 | 1.864861000  | -1.679952000 |
| 6 | -5.106633000 | -1.175376000 | 0.165218000  |
| 1 | -5.579740000 | -1.155161000 | -0.822329000 |
| 1 | -4.977411000 | -2.214027000 | 0.488648000  |
| 1 | -5.726008000 | -0.628879000 | 0.889182000  |
| 6 | 5.105931000  | -1.179121000 | -0.158699000 |
| 1 | 5.723923000  | -0.639922000 | -0.889295000 |
| 1 | 5.581208000  | -1.149681000 | 0.827602000  |
| 1 | 4.975639000  | -2.220756000 | -0.471869000 |
| 1 | 0.019174000  | 2.235131000  | -0.885415000 |
| 1 | -0.017778000 | 2.241299000  | 0.870974000  |

11. **3-H**<sup>1+</sup>, T. E. = -630.87842

|   |              |              |              |
|---|--------------|--------------|--------------|
| 6 | -3.681293000 | 0.144288000  | 0.086997000  |
| 7 | -2.657389000 | 1.024095000  | 0.091789000  |
| 6 | -1.429262000 | 0.336583000  | -0.066086000 |
| 6 | -1.798965000 | -1.009996000 | -0.157584000 |
| 7 | -3.179440000 | -1.088256000 | -0.060099000 |
| 1 | -4.731047000 | 0.393489000  | 0.191225000  |
| 1 | -1.209795000 | -1.896709000 | -0.348029000 |
| 6 | -0.198072000 | 1.046071000  | -0.128050000 |
| 6 | 3.515172000  | 0.967665000  | -0.203349000 |
| 6 | 2.228691000  | 1.418584000  | -0.239196000 |
| 6 | 1.098783000  | 0.535648000  | -0.065104000 |
| 6 | 1.466489000  | -0.837370000 | 0.184523000  |
| 6 | 2.775396000  | -1.235081000 | 0.222136000  |
| 7 | 3.812216000  | -0.362220000 | 0.012351000  |
| 1 | 4.371292000  | 1.626578000  | -0.346530000 |

|   |              |              |              |
|---|--------------|--------------|--------------|
| 1 | 2.059960000  | 2.481065000  | -0.420634000 |
| 1 | 0.712965000  | -1.595024000 | 0.387552000  |
| 1 | 3.060650000  | -2.267560000 | 0.423652000  |
| 6 | -2.804472000 | 2.470519000  | 0.247747000  |
| 1 | -2.205263000 | 2.813858000  | 1.101726000  |
| 1 | -2.475812000 | 2.987448000  | -0.664377000 |
| 1 | -3.859906000 | 2.702844000  | 0.430057000  |
| 6 | -3.964106000 | -2.325716000 | -0.120851000 |
| 1 | -5.027410000 | -2.081548000 | -0.019425000 |
| 1 | -3.797282000 | -2.822233000 | -1.085622000 |
| 1 | -3.665443000 | -2.993075000 | 0.697843000  |
| 6 | 5.211891000  | -0.801173000 | 0.108666000  |
| 1 | 5.261180000  | -1.886568000 | -0.036518000 |
| 1 | 5.805260000  | -0.316158000 | -0.677144000 |
| 1 | 5.633323000  | -0.548593000 | 1.093158000  |
| 1 | -0.281902000 | 2.126715000  | -0.254317000 |

12. **3-H<sub>2</sub><sup>12+</sup>**, T. E. = -631.15025

|   |              |              |              |
|---|--------------|--------------|--------------|
| 6 | 3.234717000  | 0.306497000  | -0.835564000 |
| 7 | 2.074268000  | 0.925068000  | -0.545579000 |
| 6 | 1.490407000  | 0.289721000  | 0.557602000  |
| 6 | 2.347343000  | -0.728386000 | 0.906951000  |
| 7 | 3.419386000  | -0.701543000 | 0.031773000  |
| 1 | 3.913508000  | 0.582321000  | -1.637249000 |
| 1 | 2.290164000  | -1.449434000 | 1.716657000  |
| 6 | 0.234276000  | 0.760395000  | 1.228120000  |
| 6 | -3.506660000 | 0.634353000  | 0.530613000  |
| 6 | -2.265181000 | 1.049655000  | 0.982799000  |
| 6 | -1.104252000 | 0.331156000  | 0.639397000  |
| 6 | -1.262898000 | -0.796825000 | -0.179859000 |
| 6 | -2.526494000 | -1.177424000 | -0.611559000 |
| 7 | -3.628919000 | -0.469178000 | -0.255853000 |
| 1 | -4.429873000 | 1.158811000  | 0.778143000  |
| 1 | -2.216960000 | 1.935536000  | 1.618836000  |

|   |              |              |              |
|---|--------------|--------------|--------------|
| 1 | -0.409685000 | -1.405915000 | -0.481335000 |
| 1 | -2.694164000 | -2.050999000 | -1.241582000 |
| 6 | 1.568763000  | 2.122840000  | -1.238708000 |
| 1 | 0.537283000  | 1.954562000  | -1.571123000 |
| 1 | 1.616180000  | 2.991480000  | -0.568622000 |
| 1 | 2.196520000  | 2.315204000  | -2.115810000 |
| 6 | 4.583380000  | -1.611391000 | 0.062847000  |
| 1 | 5.267140000  | -1.339498000 | -0.748509000 |
| 1 | 5.098743000  | -1.506631000 | 1.025619000  |
| 1 | 4.243160000  | -2.644946000 | -0.075339000 |
| 6 | -4.973647000 | -0.873746000 | -0.755326000 |
| 1 | -4.960816000 | -1.943270000 | -0.990064000 |
| 1 | -5.717779000 | -0.679982000 | 0.025251000  |
| 1 | -5.212737000 | -0.294019000 | -1.656934000 |
| 1 | 0.247294000  | 1.859181000  | 1.315516000  |
| 1 | 0.260353000  | 0.396081000  | 2.270279000  |

13. **4-H<sup>1+</sup>**, T. E. = -646.91247

|   |              |              |              |
|---|--------------|--------------|--------------|
| 6 | 2.924480000  | 0.351755000  | 0.002414000  |
| 7 | 2.487766000  | -0.931188000 | -0.002881000 |
| 6 | 1.095572000  | -0.928016000 | -0.010754000 |
| 6 | 0.703403000  | 0.450111000  | -0.010828000 |
| 7 | 1.872979000  | 1.205022000  | 0.001325000  |
| 1 | 3.965229000  | 0.655022000  | 0.000659000  |
| 6 | -0.703407000 | 0.450109000  | 0.011238000  |
| 6 | -1.095577000 | -0.928015000 | 0.010631000  |
| 7 | -1.872985000 | 1.205025000  | -0.000804000 |
| 7 | -2.487774000 | -0.931184000 | 0.002339000  |
| 6 | -0.000005000 | -1.820166000 | -0.000226000 |
| 6 | -2.924483000 | 0.351758000  | -0.002452000 |
| 1 | -3.965232000 | 0.655027000  | -0.000712000 |
| 6 | 3.340246000  | -2.119790000 | 0.001143000  |
| 1 | 3.140402000  | -2.721189000 | -0.896117000 |
| 1 | 4.392411000  | -1.813069000 | 0.004534000  |

|    |                                                           |              |              |
|----|-----------------------------------------------------------|--------------|--------------|
| 1  | 3.134151000                                               | -2.719344000 | 0.898326000  |
| 6  | 1.981052000                                               | 2.662490000  | 0.003091000  |
| 1  | 3.039529000                                               | 2.946345000  | 0.015934000  |
| 1  | 1.512427000                                               | 3.075258000  | -0.901150000 |
| 1  | 1.491723000                                               | 3.073370000  | 0.897183000  |
| 6  | -1.981049000                                              | 2.662492000  | -0.003340000 |
| 1  | -1.494095000                                              | 3.072839000  | -0.898983000 |
| 1  | -3.039555000                                              | 2.946351000  | -0.013414000 |
| 1  | -1.510018000                                              | 3.075788000  | 0.899399000  |
| 6  | -3.340229000                                              | -2.119802000 | -0.000862000 |
| 1  | -3.129437000                                              | -2.722977000 | -0.894497000 |
| 1  | -3.145096000                                              | -2.717567000 | 0.899879000  |
| 1  | -4.392360000                                              | -1.813121000 | -0.011209000 |
| 1  | -0.000001000                                              | -2.904012000 | -0.000012000 |
| 8. | <b>4-H<sub>2</sub><sup>12+</sup></b> , T. E. = -647.18063 |              |              |
| 6  | -2.928154000                                              | 0.387145000  | 0.000457000  |
| 7  | -2.515075000                                              | -0.901426000 | 0.000109000  |
| 6  | -1.139282000                                              | -0.895014000 | -0.000681000 |
| 6  | -0.726276000                                              | 0.427658000  | -0.000488000 |
| 7  | -1.858905000                                              | 1.220688000  | 0.000350000  |
| 1  | -3.965352000                                              | 0.709554000  | 0.000620000  |
| 6  | 0.726276000                                               | 0.427658000  | 0.000519000  |
| 6  | 1.139282000                                               | -0.895014000 | 0.000684000  |
| 7  | 1.858905000                                               | 1.220688000  | -0.000341000 |
| 7  | 2.515076000                                               | -0.901426000 | -0.000161000 |
| 6  | 0.000000000                                               | -1.887975000 | -0.000010000 |
| 6  | 2.928154000                                               | 0.387144000  | -0.000496000 |
| 1  | 3.965352000                                               | 0.709554000  | -0.000682000 |
| 6  | -3.404534000                                              | -2.082365000 | -0.000372000 |
| 1  | -3.213133000                                              | -2.682609000 | 0.897857000  |
| 1  | -4.445072000                                              | -1.740594000 | 0.006029000  |
| 1  | -3.221681000                                              | -2.675731000 | -0.904959000 |
| 6  | -1.946060000                                              | 2.694280000  | 0.000024000  |

|   |              |              |              |
|---|--------------|--------------|--------------|
| 1 | -3.002773000 | 2.983098000  | 0.004460000  |
| 1 | -1.464526000 | 3.092491000  | 0.901727000  |
| 1 | -1.472055000 | 3.091792000  | -0.905992000 |
| 6 | 1.946060000  | 2.694280000  | -0.000013000 |
| 1 | 1.472101000  | 3.091789000  | 0.906029000  |
| 1 | 3.002774000  | 2.983098000  | -0.004500000 |
| 1 | 1.464482000  | 3.092495000  | -0.901690000 |
| 6 | 3.404533000  | -2.082366000 | 0.000415000  |
| 1 | 3.222382000  | -2.675153000 | 0.905527000  |
| 1 | 3.212434000  | -2.683183000 | -0.897277000 |
| 1 | 4.445066000  | -1.740602000 | -0.007041000 |
| 1 | -0.000613000 | -2.539140000 | 0.890520000  |
| 1 | 0.000613000  | -2.539104000 | -0.890566000 |

9. **5-H**<sup>+</sup>, T. E. = -612.46787

|   |              |              |              |
|---|--------------|--------------|--------------|
| 6 | -1.667202000 | -1.085474000 | -0.001626000 |
| 6 | -0.723582000 | -0.081851000 | -0.000345000 |
| 6 | -1.137194000 | 1.315267000  | -0.000951000 |
| 6 | -2.529723000 | 1.586625000  | -0.003088000 |
| 6 | -3.417081000 | 0.540334000  | -0.004646000 |
| 7 | -2.995564000 | -0.776608000 | -0.004416000 |
| 1 | -1.427262000 | -2.148816000 | -0.000747000 |
| 1 | -2.913811000 | 2.607030000  | -0.004535000 |
| 1 | -4.496959000 | 0.682172000  | -0.006307000 |
| 6 | 0.723579000  | -0.081852000 | 0.000303000  |
| 6 | 1.667199000  | -1.085476000 | 0.001500000  |
| 7 | 2.995560000  | -0.776611000 | 0.004266000  |
| 6 | 3.417078000  | 0.540333000  | 0.004604000  |
| 6 | 2.529722000  | 1.586624000  | 0.003146000  |
| 6 | 1.137191000  | 1.315266000  | 0.001001000  |
| 1 | 1.427257000  | -2.148818000 | 0.000574000  |
| 1 | 4.496957000  | 0.682166000  | 0.006248000  |
| 1 | 2.913810000  | 2.607029000  | 0.004617000  |
| 6 | -0.000001000 | 2.146058000  | 0.000011000  |



|   |              |              |              |
|---|--------------|--------------|--------------|
| 6 | -4.015713000 | -1.844297000 | 0.007765000  |
| 1 | -4.685979000 | -1.727769000 | -0.853993000 |
| 1 | -3.518823000 | -2.818314000 | -0.055848000 |
| 1 | -4.597223000 | -1.796590000 | 0.938404000  |
| 6 | 4.015725000  | -1.844288000 | -0.007587000 |
| 1 | 3.518733000  | -2.818379000 | 0.054027000  |
| 1 | 4.598653000  | -1.795442000 | -0.937271000 |
| 1 | 4.684678000  | -1.728817000 | 0.855343000  |
| 1 | 0.000000000  | 3.233463000  | 0.000011000  |

10. **5-H<sub>2</sub><sup>12+</sup>**, T. E. = -612.70743

|   |              |              |              |
|---|--------------|--------------|--------------|
| 6 | 1.667235000  | -1.100046000 | 0.006656000  |
| 6 | 0.735810000  | -0.067654000 | 0.000576000  |
| 6 | 1.178350000  | 1.279808000  | 0.001957000  |
| 6 | 2.545018000  | 1.556816000  | 0.006867000  |
| 6 | 3.433680000  | 0.488742000  | 0.012553000  |
| 7 | 2.993991000  | -0.801901000 | 0.012066000  |
| 1 | 1.414599000  | -2.159956000 | 0.005866000  |
| 1 | 2.937766000  | 2.574688000  | 0.009817000  |
| 1 | 4.515413000  | 0.625087000  | 0.016224000  |
| 6 | -0.735821000 | -0.067654000 | -0.000587000 |
| 6 | -1.667245000 | -1.100040000 | -0.006710000 |
| 7 | -2.994007000 | -0.801889000 | -0.012120000 |
| 6 | -3.433690000 | 0.488749000  | -0.012570000 |
| 6 | -2.545021000 | 1.556824000  | -0.006849000 |
| 6 | -1.178359000 | 1.279814000  | -0.001942000 |
| 1 | -1.414622000 | -2.159954000 | -0.005949000 |
| 1 | -4.515420000 | 0.625102000  | -0.016240000 |
| 1 | -2.937769000 | 2.574696000  | -0.009785000 |
| 6 | -0.000002000 | 2.218901000  | 0.000008000  |
| 6 | 4.001992000  | -1.902499000 | -0.020466000 |
| 1 | 4.808521000  | -1.668838000 | 0.684069000  |
| 1 | 3.519778000  | -2.839849000 | 0.275223000  |
| 1 | 4.402296000  | -1.991472000 | -1.039127000 |

|   |              |              |              |
|---|--------------|--------------|--------------|
| 6 | -4.001949000 | -1.902537000 | 0.020534000  |
| 1 | -3.520143000 | -2.839529000 | -0.276966000 |
| 1 | -4.400831000 | -1.992708000 | 1.039652000  |
| 1 | -4.809469000 | -1.668051000 | -0.682579000 |
| 1 | 0.001566000  | 2.885973000  | -0.881114000 |
| 1 | -0.001567000 | 2.885990000  | 0.881116000  |

11. **6-H**<sup>1+</sup>, T. E. = -629.69393

|   |              |              |              |
|---|--------------|--------------|--------------|
| 6 | -1.818093000 | 0.883032000  | -0.002748000 |
| 6 | -0.653280000 | 0.141695000  | -0.000697000 |
| 6 | -0.719159000 | -1.343071000 | 0.000058000  |
| 6 | -2.010942000 | -1.923223000 | -0.001341000 |
| 6 | -3.124210000 | -1.120872000 | -0.003668000 |
| 7 | -3.028218000 | 0.261811000  | -0.004929000 |
| 1 | -1.844601000 | 1.972399000  | -0.002836000 |
| 1 | -2.143791000 | -3.005740000 | -0.001805000 |
| 1 | -4.138469000 | -1.516079000 | -0.004959000 |
| 6 | 0.739443000  | 0.433789000  | -0.000948000 |
| 6 | 1.444279000  | -0.788158000 | 0.000357000  |
| 6 | 0.570782000  | -1.901701000 | 0.000811000  |
| 7 | 2.796952000  | -0.467688000 | 0.001062000  |
| 7 | 1.682961000  | 1.453788000  | -0.000753000 |
| 6 | 2.908846000  | 0.885714000  | 0.000353000  |
| 1 | 3.845468000  | 1.432503000  | 0.000514000  |
| 6 | 1.422218000  | 2.894747000  | -0.001710000 |
| 1 | 0.853878000  | 3.168859000  | 0.897355000  |
| 1 | 2.375682000  | 3.434832000  | -0.001403000 |
| 1 | 0.855001000  | 3.167886000  | -0.901777000 |
| 6 | 3.912785000  | -1.416983000 | 0.002465000  |
| 1 | 3.860348000  | -2.047077000 | 0.900341000  |
| 1 | 3.861559000  | -2.048304000 | -0.894616000 |
| 1 | 4.859071000  | -0.864255000 | 0.002720000  |
| 6 | -4.274836000 | 1.050380000  | 0.008267000  |
| 1 | -4.029768000 | 2.116064000  | -0.057542000 |

|     |                                                           |              |              |
|-----|-----------------------------------------------------------|--------------|--------------|
| 1   | -4.899313000                                              | 0.773921000  | -0.851647000 |
| 1   | -4.827219000                                              | 0.865017000  | 0.939653000  |
| 1   | 0.823297000                                               | -2.957506000 | 0.001135000  |
| 12. | <b>6-H<sub>2</sub><sup>12+</sup></b> , T. E. = -629.94690 |              |              |
| 6   | -1.830789000                                              | 0.878674000  | -0.011024000 |
| 6   | -0.671318000                                              | 0.114079000  | 0.000301000  |
| 6   | -0.765506000                                              | -1.314395000 | 0.001300000  |
| 6   | -2.016804000                                              | -1.915502000 | -0.002829000 |
| 6   | -3.148272000                                              | -1.100015000 | -0.011100000 |
| 7   | -3.043195000                                              | 0.253966000  | -0.015376000 |
| 1   | -1.852799000                                              | 1.967334000  | -0.014158000 |
| 1   | -2.146099000                                              | -2.998904000 | -0.003970000 |
| 1   | -4.159906000                                              | -1.505275000 | -0.014268000 |
| 6   | 0.750204000                                               | 0.423074000  | -0.001090000 |
| 6   | 1.479463000                                               | -0.746838000 | 0.001457000  |
| 6   | 0.611251000                                               | -1.965645000 | 0.003427000  |
| 7   | 2.813619000                                               | -0.411590000 | 0.002436000  |
| 7   | 1.648231000                                               | 1.479556000  | -0.001379000 |
| 6   | 2.888196000                                               | 0.942089000  | 0.000527000  |
| 1   | 3.812667000                                               | 1.513235000  | 0.000322000  |
| 1   | 0.750460000                                               | -2.606554000 | 0.891597000  |
| 1   | 0.751505000                                               | -2.610343000 | -0.881777000 |
| 6   | 3.970969000                                               | -1.332298000 | 0.004664000  |
| 1   | 3.937979000                                               | -1.956185000 | 0.906572000  |
| 1   | 3.939670000                                               | -1.958376000 | -0.895785000 |
| 1   | 4.892978000                                               | -0.741070000 | 0.004812000  |
| 6   | 1.352741000                                               | 2.925753000  | -0.003835000 |
| 1   | 2.298099000                                               | 3.479301000  | -0.000854000 |
| 1   | 0.790495000                                               | 3.184260000  | -0.910195000 |
| 1   | 0.783969000                                               | 3.185849000  | 0.897982000  |
| 6   | -4.283926000                                              | 1.082976000  | 0.023132000  |
| 1   | -4.529615000                                              | 1.312549000  | 1.068663000  |
| 1   | -4.115047000                                              | 2.007886000  | -0.539062000 |

|     |                                     |              |              |
|-----|-------------------------------------|--------------|--------------|
| 1   | -5.102188000                        | 0.521066000  | -0.439217000 |
| 13. | <b>1-AuCl</b> , T. E. = -1243.87934 |              |              |
| 6   | 1.669040000                         | -3.448692000 | 0.075374000  |
| 7   | 2.812510000                         | -2.834841000 | -0.252884000 |
| 6   | 2.608383000                         | -1.465979000 | -0.275975000 |
| 6   | 1.238190000                         | -1.199071000 | -0.001723000 |
| 7   | 0.708835000                         | -2.512221000 | 0.256025000  |
| 1   | 3.366382000                         | -0.806965000 | -0.680535000 |
| 1   | 1.545686000                         | -4.514518000 | 0.224560000  |
| 6   | 0.488420000                         | 0.000007000  | 0.000079000  |
| 6   | 1.238162000                         | 1.199098000  | 0.001810000  |
| 6   | 2.608398000                         | 1.466028000  | 0.275848000  |
| 7   | 2.812478000                         | 2.834896000  | 0.252822000  |
| 6   | 1.668941000                         | 3.448738000  | -0.075221000 |
| 7   | 0.708736000                         | 2.512248000  | -0.255792000 |
| 1   | 3.366480000                         | 0.807010000  | 0.680247000  |
| 1   | 1.545538000                         | 4.514568000  | -0.224340000 |
| 6   | -0.651358000                        | 2.871937000  | -0.647237000 |
| 1   | -1.364368000                        | 2.643498000  | 0.158245000  |
| 1   | -0.666154000                        | 3.947880000  | -0.873606000 |
| 1   | -0.953712000                        | 2.297818000  | -1.533137000 |
| 6   | 4.083368000                         | 3.502127000  | 0.504737000  |
| 1   | 4.462527000                         | 3.219353000  | 1.496899000  |
| 1   | 4.819213000                         | 3.215928000  | -0.260580000 |
| 1   | 3.934257000                         | 4.588347000  | 0.477023000  |
| 6   | -0.651132000                        | -2.871901000 | 0.647916000  |
| 1   | -0.666040000                        | -3.948004000 | 0.873508000  |
| 1   | -0.952921000                        | -2.298392000 | 1.534407000  |
| 1   | -1.364489000                        | -2.642714000 | -0.157049000 |
| 6   | 4.083354000                         | -3.502062000 | -0.505055000 |
| 1   | 3.934309000                         | -4.588283000 | -0.477040000 |
| 1   | 4.462193000                         | -3.219498000 | -1.497401000 |
| 1   | 4.819420000                         | -3.215650000 | 0.259969000  |

|    |              |              |              |
|----|--------------|--------------|--------------|
| 79 | -1.559352000 | -0.000019000 | -0.000035000 |
| 17 | -3.923530000 | -0.000048000 | -0.000170000 |

14. **1-(AuCl)<sub>2</sub>**, T. E. = -1840.10824

|   |              |              |              |
|---|--------------|--------------|--------------|
| 6 | -2.141627000 | 1.681919000  | -2.724902000 |
| 7 | -2.019741000 | 2.842726000  | -2.066897000 |
| 6 | -1.170540000 | 2.651916000  | -0.985755000 |
| 6 | -0.777036000 | 1.311184000  | -0.956020000 |
| 7 | -1.403065000 | 0.747719000  | -2.099334000 |
| 1 | -1.024444000 | 3.438676000  | -0.258183000 |
| 1 | -2.725830000 | 1.523459000  | -3.623625000 |
| 6 | 0.000008000  | 0.520821000  | 0.000047000  |
| 6 | 0.777118000  | 1.310954000  | 0.956246000  |
| 6 | 1.170735000  | 2.651647000  | 0.986219000  |
| 7 | 2.020010000  | 2.842174000  | 2.067352000  |
| 6 | 2.141758000  | 1.681252000  | 2.725180000  |
| 7 | 1.403131000  | 0.747222000  | 2.099435000  |
| 1 | 1.024699000  | 3.438549000  | 0.258789000  |
| 1 | 2.725953000  | 1.522580000  | 3.623871000  |
| 6 | 1.383514000  | -0.658649000 | 2.505380000  |
| 1 | 1.824063000  | -1.268862000 | 1.700538000  |
| 1 | 1.961313000  | -0.759517000 | 3.432875000  |
| 1 | 0.340691000  | -0.981969000 | 2.652413000  |
| 6 | 2.651554000  | 4.103971000  | 2.443043000  |
| 1 | 3.245095000  | 4.486631000  | 1.601708000  |
| 1 | 1.887012000  | 4.842864000  | 2.720798000  |
| 1 | 3.315731000  | 3.933488000  | 3.298464000  |
| 6 | -1.383543000 | -0.658072000 | -2.505558000 |
| 1 | -1.961328000 | -0.758713000 | -3.433086000 |
| 1 | -0.340744000 | -0.981453000 | -2.652623000 |
| 1 | -1.824167000 | -1.268399000 | -1.700843000 |
| 6 | -2.651076000 | 4.104672000  | -2.442436000 |
| 1 | -3.315383000 | 3.934376000  | -3.297792000 |
| 1 | -3.244451000 | 4.487378000  | -1.601006000 |

|     |                                     |              |              |
|-----|-------------------------------------|--------------|--------------|
| 1   | -1.886427000                        | 4.843445000  | -2.720217000 |
| 79  | -1.429981000                        | -0.764223000 | 0.890650000  |
| 79  | 1.429899000                         | -0.764179000 | -0.890766000 |
| 17  | -3.069879000                        | -2.122321000 | 1.866824000  |
| 17  | 3.069710000                         | -2.122231000 | -1.867148000 |
| 15. | <b>2-AuCl</b> , T. E. = -1209.41446 |              |              |
| 6   | 0.001564000                         | -0.399894000 | -0.001362000 |
| 6   | -1.238528000                        | -1.088098000 | -0.027938000 |
| 6   | -1.465323000                        | -2.420898000 | 0.482786000  |
| 6   | -2.708808000                        | -2.990906000 | 0.505545000  |
| 7   | -3.817811000                        | -2.338030000 | 0.012695000  |
| 6   | -3.661203000                        | -1.047479000 | -0.459978000 |
| 6   | -2.443935000                        | -0.431864000 | -0.475804000 |
| 1   | -2.892809000                        | -3.981598000 | 0.922567000  |
| 1   | -4.570381000                        | -0.563423000 | -0.817090000 |
| 6   | 1.244487000                         | -1.082717000 | 0.025975000  |
| 6   | 1.476235000                         | -2.416480000 | -0.480101000 |
| 6   | 2.721951000                         | -2.981628000 | -0.501581000 |
| 7   | 3.828741000                         | -2.322508000 | -0.012073000 |
| 6   | 3.667384000                         | -1.030701000 | 0.455677000  |
| 6   | 2.447697000                         | -0.419918000 | 0.470150000  |
| 1   | 2.909524000                         | -3.973252000 | -0.914783000 |
| 1   | 4.574939000                         | -0.541629000 | 0.810082000  |
| 1   | -2.364887000                        | 0.594726000  | -0.839927000 |
| 1   | -0.644839000                        | -2.984017000 | 0.926929000  |
| 1   | 0.657750000                         | -2.984631000 | -0.921507000 |
| 1   | 2.364815000                         | 0.607732000  | 0.830447000  |
| 6   | 5.165743000                         | -2.904119000 | -0.136666000 |
| 1   | 5.788579000                         | -2.573680000 | 0.705092000  |
| 1   | 5.092440000                         | -3.998747000 | -0.107141000 |
| 1   | 5.648523000                         | -2.601254000 | -1.080088000 |
| 6   | -5.152466000                        | -2.924662000 | 0.139056000  |
| 1   | -5.633662000                        | -2.626613000 | 1.084820000  |

|    |              |              |              |
|----|--------------|--------------|--------------|
| 1  | -5.778604000 | -2.593209000 | -0.699789000 |
| 1  | -5.075747000 | -4.018971000 | 0.105397000  |
| 79 | -0.003854000 | 1.643706000  | -0.000437000 |
| 17 | -0.010379000 | 3.990924000  | 0.002978000  |

16. **2-(AuCl)<sub>2</sub>**, T. E. = -1805.62197

|   |              |              |              |
|---|--------------|--------------|--------------|
| 6 | -0.011066000 | 0.661159000  | -0.027135000 |
| 6 | 1.202198000  | 1.360301000  | -0.365002000 |
| 6 | 1.537379000  | 2.669398000  | 0.122265000  |
| 6 | 2.747128000  | 3.253719000  | -0.149126000 |
| 7 | 3.693549000  | 2.629980000  | -0.923887000 |
| 6 | 3.420143000  | 1.367547000  | -1.409476000 |
| 6 | 2.235312000  | 0.740144000  | -1.146987000 |
| 1 | 3.026546000  | 4.231220000  | 0.244341000  |
| 1 | 4.204696000  | 0.912332000  | -2.013449000 |
| 6 | -1.224120000 | 1.368703000  | 0.289945000  |
| 6 | -1.555120000 | 2.667696000  | -0.226816000 |
| 6 | -2.761903000 | 3.263284000  | 0.033018000  |
| 7 | -3.710015000 | 2.660927000  | 0.822494000  |
| 6 | -3.442489000 | 1.406764000  | 1.332746000  |
| 6 | -2.261391000 | 0.767844000  | 1.081919000  |
| 1 | -3.037071000 | 4.233672000  | -0.380584000 |
| 1 | -4.229112000 | 0.967503000  | 1.945741000  |
| 1 | 2.058479000  | -0.258673000 | -1.550099000 |
| 1 | 0.849840000  | 3.204373000  | 0.776766000  |
| 1 | -0.865515000 | 3.186384000  | -0.892175000 |
| 1 | -2.089742000 | -0.223205000 | 1.505629000  |
| 6 | -5.027319000 | 3.274553000  | 1.020246000  |
| 1 | -5.396487000 | 3.030596000  | 2.024652000  |
| 1 | -4.938029000 | 4.364435000  | 0.934091000  |
| 1 | -5.747567000 | 2.909646000  | 0.271595000  |
| 6 | 5.014802000  | 3.232181000  | -1.130844000 |
| 1 | 5.731045000  | 2.878090000  | -0.373264000 |
| 1 | 5.384879000  | 2.966139000  | -2.129284000 |

|     |                                     |              |              |
|-----|-------------------------------------|--------------|--------------|
| 1   | 4.931599000                         | 4.324039000  | -1.066570000 |
| 79  | -0.593544000                        | -0.996732000 | -1.256235000 |
| 79  | 0.598592000                         | -0.922299000 | 1.291701000  |
| 17  | -1.315619000                        | -2.406182000 | -2.956144000 |
| 17  | 1.350419000                         | -2.203183000 | 3.077440000  |
| 17. | <b>3-AuCl</b> , T. E. = -1226.65556 |              |              |
| 6   | 1.340514000                         | 3.516975000  | 0.516525000  |
| 7   | 1.128700000                         | 2.229425000  | 0.849311000  |
| 6   | 0.070022000                         | 1.689788000  | 0.065487000  |
| 6   | -0.337690000                        | 2.765197000  | -0.727276000 |
| 7   | 0.456817000                         | 3.862034000  | -0.436942000 |
| 1   | 2.095744000                         | 4.168600000  | 0.940310000  |
| 1   | -1.074591000                        | 2.794054000  | -1.520618000 |
| 6   | -0.320156000                        | 0.306260000  | 0.083661000  |
| 6   | -3.410706000                        | -1.781839000 | -0.115758000 |
| 6   | -2.101510000                        | -1.419764000 | -0.094233000 |
| 6   | -1.669408000                        | -0.038583000 | 0.069612000  |
| 6   | -2.786555000                        | 0.879481000  | 0.256496000  |
| 6   | -4.084450000                        | 0.466587000  | 0.240085000  |
| 7   | -4.438296000                        | -0.854223000 | 0.018844000  |
| 1   | -3.729965000                        | -2.815565000 | -0.252934000 |
| 1   | -1.333456000                        | -2.186257000 | -0.216505000 |
| 1   | -2.597646000                        | 1.937862000  | 0.441739000  |
| 1   | -4.918144000                        | 1.152646000  | 0.397487000  |
| 6   | 1.868748000                         | 1.507972000  | 1.883132000  |
| 1   | 1.187382000                         | 1.229005000  | 2.697928000  |
| 1   | 2.278383000                         | 0.581767000  | 1.444026000  |
| 1   | 2.670982000                         | 2.154403000  | 2.260485000  |
| 6   | 0.387501000                         | 5.164369000  | -1.095203000 |
| 1   | 1.135537000                         | 5.832594000  | -0.652159000 |
| 1   | 0.595071000                         | 5.053660000  | -2.168313000 |
| 1   | -0.611400000                        | 5.600348000  | -0.958106000 |
| 6   | -5.821185000                        | -1.293542000 | 0.157952000  |



|     |                                                   |              |              |
|-----|---------------------------------------------------|--------------|--------------|
| 1   | -6.496977000                                      | -0.488891000 | -0.162639000 |
| 1   | -5.996440000                                      | -2.165945000 | -0.486738000 |
| 1   | -6.066373000                                      | -1.568746000 | 1.199246000  |
| 79  | 1.191951000                                       | -1.061759000 | -0.100989000 |
| 17  | 2.932732000                                       | -2.625800000 | -0.320380000 |
| 18. | <b>3-(AuCl)<sub>2</sub></b> , T. E. = -1822.86561 |              |              |
| 6   | 2.044275000                                       | 3.104663000  | 1.442467000  |
| 7   | 1.641779000                                       | 1.836918000  | 1.237891000  |
| 6   | 0.482741000                                       | 1.827506000  | 0.422633000  |
| 6   | 0.223692000                                       | 3.177776000  | 0.183525000  |
| 7   | 1.198217000                                       | 3.934516000  | 0.812313000  |
| 1   | 2.905770000                                       | 3.405385000  | 2.026892000  |
| 1   | -0.524714000                                      | 3.640900000  | -0.446841000 |
| 6   | -0.134748000                                      | 0.622531000  | -0.116079000 |
| 6   | -3.331195000                                      | -0.228034000 | -1.920118000 |
| 6   | -2.033809000                                      | -0.257866000 | -1.502120000 |
| 6   | -1.508321000                                      | 0.691221000  | -0.552224000 |
| 6   | -2.479615000                                      | 1.658356000  | -0.103788000 |
| 6   | -3.778028000                                      | 1.636967000  | -0.536546000 |
| 7   | -4.225169000                                      | 0.718131000  | -1.453289000 |
| 1   | -3.729263000                                      | -0.937693000 | -2.645097000 |
| 1   | -1.359377000                                      | -1.016175000 | -1.904631000 |
| 1   | -2.210749000                                      | 2.397109000  | 0.650507000  |
| 1   | -4.526415000                                      | 2.340204000  | -0.169693000 |
| 6   | 2.379914000                                       | 0.672398000  | 1.733362000  |
| 1   | 1.709723000                                       | 0.040184000  | 2.334983000  |
| 1   | 2.731724000                                       | 0.080177000  | 0.873530000  |
| 1   | 3.225465000                                       | 1.029454000  | 2.334828000  |
| 6   | 1.288256000                                       | 5.393224000  | 0.798838000  |
| 1   | 2.192242000                                       | 5.702419000  | 1.336321000  |
| 1   | 1.347297000                                       | 5.751518000  | -0.237572000 |
| 1   | 0.408388000                                       | 5.829880000  | 1.290727000  |
| 6   | -5.635268000                                      | 0.659810000  | -1.846065000 |

|    |              |              |              |
|----|--------------|--------------|--------------|
| 1  | -6.094913000 | 1.645297000  | -1.701462000 |
| 1  | -5.711076000 | 0.391388000  | -2.908206000 |
| 1  | -6.182225000 | -0.084351000 | -1.246053000 |
| 79 | -0.408231000 | -1.000536000 | 1.272167000  |
| 79 | 1.233493000  | -0.501441000 | -1.242573000 |
| 17 | 2.786134000  | -1.581026000 | -2.610381000 |
| 17 | -0.714886000 | -2.580023000 | 2.955800000  |

19. **4-AuCl**, T. E. = -1242.69568

|   |              |              |              |
|---|--------------|--------------|--------------|
| 6 | 2.333437000  | -2.925759000 | -0.020823000 |
| 7 | 1.061525000  | -2.467077000 | 0.003859000  |
| 6 | 1.076572000  | -1.070593000 | 0.041067000  |
| 6 | 2.475874000  | -0.699206000 | 0.045593000  |
| 7 | 3.208324000  | -1.882496000 | -0.011037000 |
| 1 | 2.623680000  | -3.969784000 | -0.006984000 |
| 6 | 2.475826000  | 0.699250000  | -0.045239000 |
| 6 | 1.076512000  | 1.070546000  | -0.040405000 |
| 7 | 3.208227000  | 1.882604000  | 0.010884000  |
| 7 | 1.061385000  | 2.467030000  | -0.003692000 |
| 6 | 0.156802000  | -0.000039000 | 0.000439000  |
| 6 | 2.333272000  | 2.925803000  | 0.020618000  |
| 1 | 2.623418000  | 3.969849000  | 0.006421000  |
| 6 | -0.146220000 | -3.290139000 | 0.023234000  |
| 1 | -0.871629000 | -2.866874000 | -0.684825000 |
| 1 | 0.108790000  | -4.319379000 | -0.259183000 |
| 1 | -0.598237000 | -3.272396000 | 1.024744000  |
| 6 | 4.656282000  | -2.012992000 | -0.035890000 |
| 1 | 4.927081000  | -3.074817000 | -0.084628000 |
| 1 | 5.066958000  | -1.501149000 | -0.919875000 |
| 1 | 5.095310000  | -1.574285000 | 0.873194000  |
| 6 | 4.656191000  | 2.013236000  | 0.034759000  |
| 1 | 5.094662000  | 1.574757000  | -0.874706000 |
| 1 | 4.926917000  | 3.075078000  | 0.083546000  |
| 1 | 5.067503000  | 1.501261000  | 0.918367000  |

|    |              |              |              |
|----|--------------|--------------|--------------|
| 6  | -0.146425000 | 3.289975000  | -0.021795000 |
| 1  | -0.604420000 | 3.264434000  | -1.020387000 |
| 1  | -0.867754000 | 2.872598000  | 0.693861000  |
| 1  | 0.110530000  | 4.321329000  | 0.250973000  |
| 79 | -1.856127000 | -0.000029000 | 0.000049000  |
| 17 | -4.207868000 | 0.000042000  | -0.000814000 |

20. **4-(AuCl)<sub>2</sub>**, T. E. = -1838.91415

|   |              |              |              |
|---|--------------|--------------|--------------|
| 6 | 2.642751000  | 0.199101000  | 2.920683000  |
| 7 | 1.370266000  | 0.161792000  | 2.467734000  |
| 6 | 1.390651000  | 0.059246000  | 1.086344000  |
| 6 | 2.762119000  | 0.031451000  | 0.707055000  |
| 7 | 3.510932000  | 0.125825000  | 1.874632000  |
| 1 | 2.936551000  | 0.264928000  | 3.961608000  |
| 6 | 2.761901000  | -0.036240000 | -0.707114000 |
| 6 | 1.390313000  | -0.062562000 | -1.086073000 |
| 7 | 3.510342000  | -0.130101000 | -1.874963000 |
| 7 | 1.369496000  | -0.164129000 | -2.467530000 |
| 6 | 0.443909000  | -0.001180000 | 0.000293000  |
| 6 | 2.641833000  | -0.202128000 | -2.920824000 |
| 1 | 2.935312000  | -0.267564000 | -3.961866000 |
| 6 | 0.152178000  | 0.218295000  | 3.278456000  |
| 1 | -0.431034000 | -0.697793000 | 3.107918000  |
| 1 | 0.423886000  | 0.312531000  | 4.336412000  |
| 1 | -0.448727000 | 1.080088000  | 2.953999000  |
| 6 | 4.963775000  | 0.141009000  | 1.995596000  |
| 1 | 5.237659000  | 0.218127000  | 3.054429000  |
| 1 | 5.388197000  | -0.787110000 | 1.586208000  |
| 1 | 5.378978000  | 1.005834000  | 1.457983000  |
| 6 | 4.963142000  | -0.145923000 | -1.996356000 |
| 1 | 5.378115000  | -1.011254000 | -1.459385000 |
| 1 | 5.236681000  | -0.222506000 | -3.055318000 |
| 1 | 5.388100000  | 0.781762000  | -1.586539000 |
| 6 | 0.151179000  | -0.219524000 | -3.278020000 |

|    |              |              |              |
|----|--------------|--------------|--------------|
| 1  | -0.448025000 | -1.083888000 | -2.957345000 |
| 1  | -0.433638000 | 0.694722000  | -3.103108000 |
| 1  | 0.422665000  | -0.308175000 | -4.336521000 |
| 79 | -1.048100000 | 1.479552000  | -0.080525000 |
| 79 | -1.051273000 | -1.478388000 | 0.080566000  |
| 17 | -2.496675000 | 3.304453000  | -0.169267000 |
| 17 | -2.504736000 | -3.299431000 | 0.169205000  |

21. **5-AuCl**, T. E. = -1208.25303

|   |              |              |              |
|---|--------------|--------------|--------------|
| 6 | 3.286982000  | -1.665231000 | -0.007311000 |
| 6 | 2.288850000  | -0.723587000 | -0.001398000 |
| 6 | 0.882001000  | -1.121010000 | -0.004599000 |
| 6 | 0.608566000  | -2.515421000 | -0.016048000 |
| 6 | 1.643424000  | -3.412946000 | -0.022571000 |
| 7 | 2.971754000  | -3.000146000 | -0.021754000 |
| 1 | 4.353004000  | -1.433030000 | -0.003453000 |
| 1 | -0.423820000 | -2.868853000 | -0.022887000 |
| 1 | 1.496735000  | -4.492333000 | -0.031272000 |
| 6 | 2.288851000  | 0.723584000  | 0.001391000  |
| 6 | 3.286984000  | 1.665226000  | 0.007297000  |
| 7 | 2.971759000  | 3.000141000  | 0.021722000  |
| 6 | 1.643429000  | 3.412943000  | 0.022541000  |
| 6 | 0.608570000  | 2.515420000  | 0.016027000  |
| 6 | 0.882003000  | 1.121008000  | 0.004591000  |
| 1 | 4.353006000  | 1.433021000  | 0.003441000  |
| 1 | 1.496742000  | 4.492331000  | 0.031234000  |
| 1 | -0.423816000 | 2.868853000  | 0.022861000  |
| 6 | 0.009319000  | 0.000000000  | 0.000003000  |
| 6 | 4.028395000  | -4.016262000 | 0.037518000  |
| 1 | 3.833795000  | -4.801119000 | -0.706258000 |
| 1 | 4.993962000  | -3.549334000 | -0.190367000 |
| 1 | 4.077474000  | -4.471133000 | 1.038839000  |
| 6 | 4.028391000  | 4.016270000  | -0.037467000 |
| 1 | 4.994012000  | 3.549251000  | 0.190001000  |

|    |              |             |              |
|----|--------------|-------------|--------------|
| 1  | 4.077215000  | 4.471473000 | -1.038648000 |
| 1  | 3.833999000  | 4.800882000 | 0.706625000  |
| 79 | -1.993147000 | 0.000001000 | 0.000003000  |
| 17 | -4.336638000 | 0.000001000 | 0.000000000  |

22. **5-(AuCl)<sub>2</sub>**, T. E. = -1804.45985

|    |              |              |              |
|----|--------------|--------------|--------------|
| 6  | 3.684621000  | -1.651528000 | -0.184211000 |
| 6  | 2.678245000  | -0.720025000 | -0.079842000 |
| 6  | 1.285050000  | -1.126835000 | -0.127329000 |
| 6  | 1.013311000  | -2.508400000 | -0.284526000 |
| 6  | 2.054180000  | -3.394831000 | -0.384792000 |
| 7  | 3.377120000  | -2.976064000 | -0.338883000 |
| 1  | 4.748187000  | -1.412646000 | -0.154321000 |
| 1  | -0.015144000 | -2.868675000 | -0.328109000 |
| 1  | 1.912006000  | -4.467695000 | -0.506181000 |
| 6  | 2.678246000  | 0.720044000  | 0.079701000  |
| 6  | 3.684623000  | 1.651544000  | 0.184076000  |
| 7  | 3.377123000  | 2.976080000  | 0.338761000  |
| 6  | 2.054184000  | 3.394851000  | 0.384657000  |
| 6  | 1.013314000  | 2.508420000  | 0.284383000  |
| 6  | 1.285050000  | 1.126856000  | 0.127189000  |
| 1  | 4.748189000  | 1.412662000  | 0.154190000  |
| 1  | 1.912010000  | 4.467714000  | 0.506046000  |
| 1  | -0.015140000 | 2.868698000  | 0.327969000  |
| 6  | 0.404499000  | 0.000010000  | -0.000069000 |
| 6  | 4.440950000  | -3.988169000 | -0.397135000 |
| 1  | 4.253682000  | -4.675766000 | -1.232723000 |
| 1  | 5.404851000  | -3.491982000 | -0.558858000 |
| 1  | 4.482352000  | -4.558921000 | 0.542529000  |
| 6  | 4.440968000  | 3.988177000  | 0.396894000  |
| 1  | 5.404799000  | 3.492038000  | 0.559181000  |
| 1  | 4.482704000  | 4.558506000  | -0.543014000 |
| 1  | 4.253431000  | 4.676157000  | 1.232104000  |
| 79 | -1.212716000 | 0.162790000  | -1.368336000 |

|     |                                     |              |              |
|-----|-------------------------------------|--------------|--------------|
| 79  | -1.212588000                        | -0.162797000 | 1.368391000  |
| 17  | -2.398912000                        | 0.399995000  | -3.348169000 |
| 17  | -2.398503000                        | -0.400015000 | 3.348389000  |
| 23. | <b>6-AuCl</b> , T. E. = -1225.47985 |              |              |
| 6   | -3.690766000                        | -0.837170000 | -0.008748000 |
| 6   | -2.507394000                        | -0.137382000 | -0.012204000 |
| 6   | -1.191186000                        | -0.864333000 | -0.015537000 |
| 6   | -1.270028000                        | -2.279741000 | -0.017324000 |
| 6   | -2.484012000                        | -2.916761000 | -0.015141000 |
| 7   | -3.685643000                        | -2.204077000 | -0.013458000 |
| 1   | -4.677328000                        | -0.371148000 | -0.003346000 |
| 1   | -0.352673000                        | -2.871116000 | -0.022102000 |
| 1   | -2.591471000                        | -4.000083000 | -0.016345000 |
| 6   | -2.128492000                        | 1.232284000  | -0.015195000 |
| 6   | -0.714613000                        | 1.278954000  | -0.014956000 |
| 6   | -0.080646000                        | 0.007294000  | -0.016799000 |
| 7   | -0.367371000                        | 2.630400000  | 0.003822000  |
| 7   | -2.586967000                        | 2.541156000  | 0.003778000  |
| 6   | -1.507200000                        | 3.364358000  | 0.012782000  |
| 1   | -1.557723000                        | 4.447255000  | 0.023143000  |
| 6   | -4.942190000                        | -2.954978000 | 0.037443000  |
| 1   | -5.784435000                        | -2.265891000 | -0.098153000 |
| 1   | -4.967417000                        | -3.703495000 | -0.767774000 |
| 1   | -5.052382000                        | -3.466340000 | 1.006418000  |
| 6   | 0.999658000                         | 3.161501000  | -0.016218000 |
| 1   | 1.678258000                         | 2.316879000  | 0.184387000  |
| 1   | 1.233976000                         | 3.578076000  | -1.005642000 |
| 1   | 1.116412000                         | 3.930916000  | 0.758202000  |
| 6   | -3.977051000                        | 2.982402000  | 0.020429000  |
| 1   | -4.479663000                        | 2.602299000  | 0.921360000  |
| 1   | -4.012117000                        | 4.078379000  | 0.025642000  |
| 1   | -4.497424000                        | 2.610615000  | -0.873709000 |
| 79  | 1.895777000                         | -0.351732000 | -0.001740000 |

17 4.213000000 -0.711202000 0.024424000

24. **6-(AuCl)<sub>2</sub>**, T. E. = -1821.69053

6 -4.057012000 -0.000040000 -0.740536000

6 -2.859346000 -0.002224000 -0.059484000

6 -1.573518000 -0.006222000 -0.803681000

6 -1.660076000 -0.008069000 -2.212593000

6 -2.884911000 -0.005104000 -2.833408000

7 -4.070519000 0.001485000 -2.105353000

1 -5.034597000 0.001964000 -0.257771000

1 -0.751435000 -0.008975000 -2.816185000

1 -3.004964000 -0.005675000 -3.915174000

6 -2.468308000 0.003642000 1.312308000

6 -1.066517000 0.001278000 1.360631000

6 -0.433180000 -0.003822000 0.069116000

7 -0.708905000 0.003893000 2.700549000

7 -2.926984000 0.007124000 2.623814000

6 -1.842812000 0.007289000 3.439288000

1 -1.883939000 0.010621000 4.522667000

6 -5.342007000 -0.040225000 -2.838371000

1 -6.170531000 0.122045000 -2.139189000

1 -5.360622000 0.753109000 -3.598363000

1 -5.471903000 -1.016278000 -3.329296000

6 0.665650000 0.003755000 3.209736000

1 1.183922000 -0.889655000 2.833734000

1 1.185134000 0.895088000 2.830454000

1 0.645042000 0.005804000 4.305979000

6 -4.316767000 0.008807000 3.071637000

1 -4.828729000 -0.891535000 2.704033000

1 -4.344973000 0.013735000 4.167537000

1 -4.829048000 0.905664000 2.696082000

79 1.117924000 1.408474000 -0.228589000

79 1.125101000 -1.407700000 -0.220288000

17 2.412418000 3.332903000 -0.390154000

17 2.437309000 -3.321077000 -0.370091000
